# Supplementary material
Source: PubMed Central journal article supplement (PMC4623879)
Supplement: NIHMS707256-supplement-01.pdf [file NIHMS707256-supplement-01.pdf]

**Table 1 (Online only): Codes used within this study**

---

| <b>Diagnosis</b>                 | <b>ICD9 CODES</b>      |
|----------------------------------|------------------------|
| Endophthalmitis                  | 360.0x, 360.1x         |
| Diabetes                         | 250.xx, 362.0x, 362.82 |
| Age-related Macular Degeneration | 362.50, 362.51, 361.52 |
| Retinal Vein Occlusion           | 362.3x                 |
| Cystoid Macular Edema            | 362.53, 362.83         |
| Other Neovascularization         | 362.16, 365.83, 365.89 |

  

| <b>PROCEDURES</b>          | <b>CPT CODES</b>                                     |
|----------------------------|------------------------------------------------------|
| Intravitreal injection     | 67028                                                |
| Vitreous tap               | 67015                                                |
| Vitreous tap and injection | 67025                                                |
| Pars Plana Vitrectomy      | 67036                                                |
| Intraocular Surgery        | 650xx-653xx, 657xx-660xx, 671xx, 67250, 67255, 67299 |

  

| <b>DRUGS</b>                    | <b>DRUG CODES</b>                        |
|---------------------------------|------------------------------------------|
| Bevacizumab                     | J3590, J9035, J3490, C9257, C9399, Q2024 |
| Ranibizumab                     | J2778, C9233                             |
| Aflibercept                     | J0178, C9291                             |
| Pegaptanib                      | J2503                                    |
| Triamcinolone                   | J3301, J3302, J3303                      |
| Preservative Free Triamcinolone | J3300                                    |
| Dexamethasone                   | J1100                                    |
| Dexamethasone Implant           | J7312                                    |

---
